# Supplementary material
Source: PubMed Central journal article supplement (PMC3517179)
Supplement: NIHMS415697-supplement-01.pdf [file NIHMS415697-supplement-01.pdf]

**eTable 1.** Association between randomized multivitamin assignment and the risk of total cancer according to baseline characteristics and treatment assignment in the Physicians' Health Study II.

| Group                                          | Multivitamin                               |               | Hazard Ratio <sup>a</sup> (95% CI) | P Interaction |
|------------------------------------------------|--------------------------------------------|---------------|------------------------------------|---------------|
|                                                | No. of Men<br>(No. of Total Cancer Events) |               |                                    |               |
|                                                | Active                                     | Placebo       |                                    |               |
| <b>Age, years</b>                              |                                            |               |                                    | 0.06          |
| 50-59                                          | 2,944 (335)                                | 2,947 (349)   | 0.96 (0.83-1.11)                   |               |
| 60-69                                          | 2,348 (529)                                | 2,348 (523)   | 1.01 (0.89-1.14)                   |               |
| ≥70                                            | 2,025 (426)                                | 2,029 (507)   | 0.82 (0.72-0.93)                   |               |
| <b>Body mass index, kg/m<sup>2</sup></b>       |                                            |               |                                    | 0.26          |
| <25                                            | 3,039 (502)                                | 3,021 (573)   | 0.86 (0.76-0.97)                   |               |
| 25-29                                          | 2,463 (627)                                | 2,348 (642)   | 0.97 (0.87-1.08)                   |               |
| ≥30                                            | 815 (161)                                  | 826 (163)     | 1.01 (0.81-1.26)                   |               |
| <b>Smoking status</b>                          |                                            |               |                                    | 0.19          |
| Never                                          | 4,145 (657)                                | 4,107 (721)   | 0.89 (0.80-0.99)                   |               |
| Former                                         | 2,908 (579)                                | 2,944 (587)   | 0.99 (0.89-1.12)                   |               |
| Current                                        | 255 (53)                                   | 269 (70)      | 0.72 (0.50-1.03)                   |               |
| <b>Exercise ≥1 time/week</b>                   |                                            |               |                                    | 0.34          |
| No                                             | 2,699 (497)                                | 2,806 (568)   | 0.88 (0.78-1.00)                   |               |
| Yes                                            | 4,444 (768)                                | 4,328 (784)   | 0.95 (0.86-1.05)                   |               |
| <b>Alcohol consumption</b>                     |                                            |               |                                    | 0.44          |
| Rarely/never                                   | 1,391 (220)                                | 1,339 (234)   | 0.87 (0.72-1.05)                   |               |
| ≥1 drink/month                                 | 5,874 (1,061)                              | 5,942 (1,136) | 0.94 (0.86-1.02)                   |               |
| <b>Current aspirin use</b>                     |                                            |               |                                    | 0.18          |
| No                                             | 1,625 (256)                                | 1,636 (302)   | 0.83 (0.70-0.98)                   |               |
| Yes                                            | 5,602 (1,021)                              | 5,565 (1,062) | 0.95 (0.87-1.03)                   |               |
| <b>Parental history of cancer <sup>b</sup></b> |                                            |               |                                    | 0.012         |
| No                                             | 2,956 (476)                                | 2,881 (528)   | 0.86 (0.76-0.98)                   |               |
| Yes                                            | 3,319 (652)                                | 3,402 (639)   | 1.05 (0.94-1.17)                   |               |
| <b>History of cancer</b>                       |                                            |               |                                    | 0.07          |
| No                                             | 6,669 (1,195)                              | 6,660 (1,253) | 0.94 (0.87-1.02)                   |               |
| Yes                                            | 648 (95)                                   | 664 (126)     | 0.73 (0.56-0.96)                   |               |
| <b>Fruit and vegetable intake <sup>c</sup></b> |                                            |               |                                    | 0.50          |
| <4 servings/day                                | 2,994 (505)                                | 3,075 (542)   | 0.94 (0.84-1.06)                   |               |
| 4-7 servings/day                               | 2,729 (514)                                | 2,615 (510)   | 0.97 (0.85-1.09)                   |               |
| ≥7 servings/day                                | 935 (144)                                  | 962 (174)     | 0.83 (0.66-1.03)                   |               |
| <b>Whole grain intake <sup>c</sup></b>         |                                            |               |                                    | 0.68          |
| <2 servings/day                                | 4,952 (863)                                | 4,999 (905)   | 0.95 (0.86-1.04)                   |               |
| ≥2 servings/day                                | 1,685 (297)                                | 1,644 (319)   | 0.91 (0.78-1.07)                   |               |

| <b>Multivitamin</b>                 |                                            |                |                                           |                                       |
|-------------------------------------|--------------------------------------------|----------------|-------------------------------------------|---------------------------------------|
| <b>Group</b>                        | <b><u>No. of Men</u></b>                   |                | <b>Hazard Ratio <sup>a</sup> (95% CI)</b> | <b><i>P</i></b><br><b>Interaction</b> |
|                                     | <b><u>(No. of Total Cancer Events)</u></b> |                |                                           |                                       |
|                                     | <b>Active</b>                              | <b>Placebo</b> |                                           |                                       |
| <b>Red meat intake <sup>c</sup></b> |                                            |                |                                           | <b>0.30</b>                           |
| <b>&lt;1 serving/day</b>            | 4,900 (834)                                | 4,928 (860)    | 0.97 (0.88-1.06)                          |                                       |
| <b>≥1 servings/day</b>              | 1,736 (326)                                | 1,704 (360)    | 0.88 (0.76-1.02)                          |                                       |
| <b>Randomized to vitamin C</b>      |                                            |                |                                           | <b>0.82</b>                           |
| <b>Placebo</b>                      | 3,653 (638)                                | 3,659 (689)    | 0.92 (0.82-1.02)                          |                                       |
| <b>Active</b>                       | 3,664 (652)                                | 3,665 (690)    | 0.93 (0.84-1.04)                          |                                       |
| <b>Randomized to vitamin E</b>      |                                            |                |                                           | <b>0.93</b>                           |
| <b>Placebo</b>                      | 3,667 (643)                                | 3,659 (684)    | 0.92 (0.83-1.03)                          |                                       |
| <b>Active</b>                       | 3,650 (647)                                | 3,665 (695)    | 0.93 (0.83-1.03)                          |                                       |
| <b>Randomized to β-carotene</b>     |                                            |                |                                           | <b>0.50</b>                           |
| <b>Placebo</b>                      | 3,632 (638)                                | 3,645 (664)    | 0.95 (0.85-1.06)                          |                                       |
| <b>Active</b>                       | 3,685 (652)                                | 3,679 (715)    | 0.90 (0.81-1.00)                          |                                       |

Abbreviations: CI, confidence interval; HR, hazard ratio.

- a Adjusted for age, PHS cohort (original PHS I participant, new PHS II participant), and randomized treatment assignment (beta-carotene, multivitamin, and vitamin C).
- b Excludes 2,083 men with missing information on parental history of cancer.
- c Among 13,310, 13,280, and 13,268 men with available dietary data on fruit and vegetable, whole grain, and red meat intake, respectively.

**eTable 2.** Vitamins and minerals contained in the Centrum Silver formulation used in the Physicians' Health Study II trial.

| <b>Vitamin or mineral</b> | <b>Amount</b> |
|---------------------------|---------------|
| Vitamin A (IU)            | 5000*         |
| Vitamin C (mg)            | 60            |
| Vitamin D (IU)            | 400           |
| Vitamin E (IU)            | 45            |
| Vitamin K (µg)            | 10            |
| Thiamin (mg)              | 1.5           |
| Riboflavin (mg)           | 1.7           |
| Niacin (mg)               | 20            |
| Vitamin B6 (mg)           | 3             |
| Folic Acid (µg)           | 400           |
| Vitamin B12 (µg)          | 25            |
| Biotin (µg)               | 30            |
| Pantothenic Acid (mg)     | 10            |
| Calcium (mg)              | 200           |
| Iron (mg)                 | 4             |
| Phosphorus (mg)           | 48            |
| Iodine (µg)               | 150           |
| Magnesium (mg)            | 100           |
| Zinc (mg)                 | 15            |
| Selenium (µg)             | 20            |
| Copper (mg)               | 2             |
| Manganese (mg)            | 3.5           |
| Chromium (µg)             | 130           |
| Molybdenum (µg)           | 160           |
| Chloride (mg)             | 72.6          |
| Potassium (mg)            | 80            |
| Boron (µg)                | 150           |
| Nickel (µg)               | 5             |
| Vanadium (µg)             | 10            |
| Silicon (mg)              | 2             |

\* 50% as beta-carotene
